# Supplementary material for: Three-dimensional reconstruction of a whole insect reveals its phloem sap-sucking mechanism at nano-resolution
Source: eLife. 2021 Feb 23;10:e62875. doi: 10.7554/eLife.62875 (PMC8016479; doi:10.7554/eLife.62875)
Supplement: Figure 4—source data 1. — Related to Figure 4C. [file elife-62875-fig4-data1.xlsx]

## Sheet: measured data
	relaxed nymph n°	beak length	head width	Ratio beak / head
	1	121	153	0.79085
	2	123	158	0.778481
	3	118	170	0.694118
	4	142	197	0.720812
	5	136	156	0.871795
	6	131	154	0.850649
	7	138	168	0.821429
	8	141	202	0.69802
	9	149	176	0.846591
	10	136	173	0.786127
	11	128	156	0.820513
	12	135	144	0.9375
	feeding nymph n°	beak length	head width	protruding stylet	Ratio beak / head	Ratio （stylet+beak） / head
	1	53	110	42	0.481818	0.863636
	2	90	165	29	0.545455	0.721212
	3	65	164	22	0.396341	0.530488
	4	78	150	11	0.52	0.593333
	5	90	197	26	0.456853	0.588832
	6	78	195	26	0.4	0.533333
	7	94	180	24	0.522222	0.655556
	8	89	159	17	0.559748	0.666667
	9	93	179	27	0.519553	0.670391
	10	102	176	19	0.579545	0.6875
	11	97	210	26	0.461905	0.585714
	12	102	168	20	0.607143	0.72619
	13	90	141	26	0.638298	0.822695
	14	101	171	20	0.590643	0.707602
	15	94	165	28	0.569697	0.739394
	16	120	212	28	0.566038	0.698113
	17	112	217	35	0.516129	0.677419
	18	86	158	21	0.544304	0.677215
	19	108	178	6	0.606742	0.640449

## Sheet: comparison
	relaxed beak vs feeding beak+stylet						relaxed beak vs feeding beak
	Unpaired t test						Unpaired t test
	P value				0.0002		P value				<0.0001
	P value summary				***		P value summary				****
	Significantly different (P < 0.05)?				Yes		Significantly different (P < 0.05)?				Yes
	One- or two-tailed P value?				Two-tailed		One- or two-tailed P value?				Two-tailed
	df				29		df				29
	t				4.294		t				10.58
	How big is the difference?						How big is the difference?
	Mean of relaxed beak				0.8014		Mean of relaxed beak				0.8014
	Mean of feeding beak + stylet				0.6729		Mean of feeding beak				0.5307
	Difference between means (A - B) ± SEM				0.1285 ± 0.02992		Difference between means (A - B) ± SEM				0.2708 ± 0.02559
	95% confidence interval				0.06728 to 0.1897		95% confidence interval				0.2184 to 0.3231
	R squared (eta squared)				0.3887		R squared (eta squared)				0.7942
	F test to compare variances						F test to compare variances
	F, DFn, Dfd				1.391, 18, 11		F, DFn, Dfd				1.391, 18, 11
	P value				0.5848		P value				0.5848
	P value summary				ns		P value summary				ns
	Significantly different (P < 0.05)?				No		Significantly different (P < 0.05)?				No
	Data analyzed						Data analyzed
	Sample size, relaxed beak				12		Sample size, relaxed beak				12
	Sample size, feeding beak + stylet				19		Sample size, feeding beak + stylet				19
